# Supplementary material for: Tropical upper-tropospheric trends in ozone and carbon monoxide (2005–2020): observational and model results
Source: Copernicus journal article supplement (doi:10.5194/acp-25-597-2025), 2025-01-17
Supplement: Supplementary file 1 [file acp-25-597-2025-supplement.pdf]

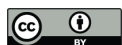

*Supplement of*

## **Tropical upper-tropospheric trends in ozone and carbon monoxide (2005–2020): observational and model results**

**Lucien Froidevaux et al.**

*Correspondence to:* Lucien Froidevaux (lucienf@jpl.nasa.gov)

The copyright of individual parts of the supplement might differ from the article licence.

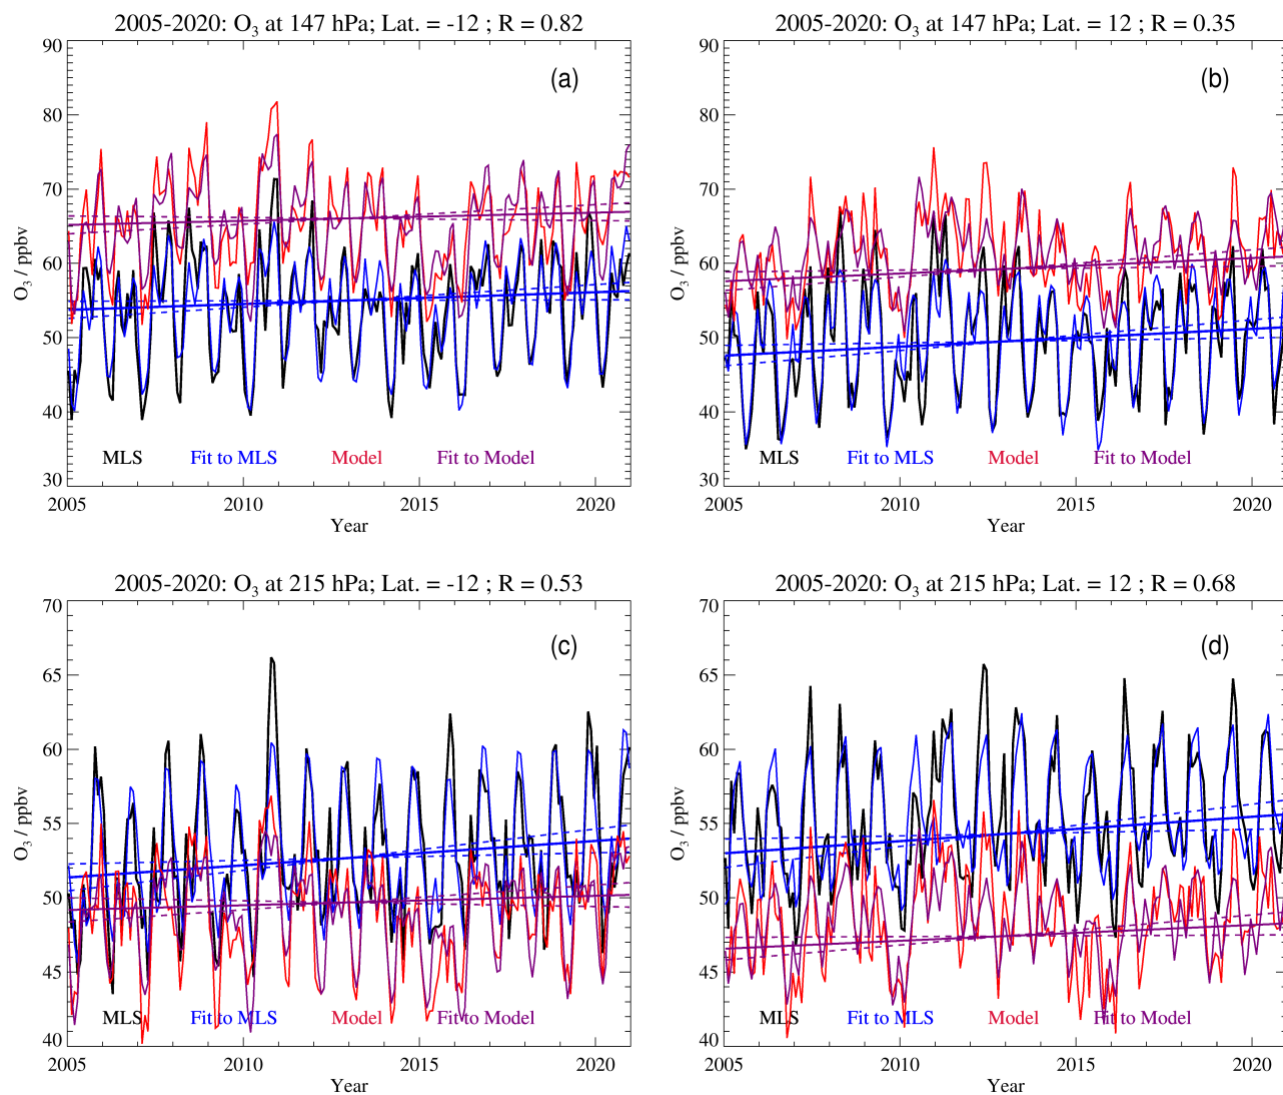

**Figure S1.** Examples of MLS and model simulation (from WACCM-CEDS) O<sub>3</sub> monthly zonal mean time series (2005—2020) for (a) 147 hPa and 12°S (meaning 10°S to 14°S), (b) 147 hPa and 12°N, (c) 215 hPa and 12°S, and (d) 215 hPa and 12°N. The MLS data (black) are fitted by the MLR model (shown in blue), and the WACCM-CEDS series (red) are fitted by the same type of regression model (purple). The blue and purple dashed lines are the linear components of the regression fits for the MLS and WACCM-CEDS curves, respectively. The correlation coefficient values (R) for the WACCM-CEDS versus MLS series are shown above each panel.

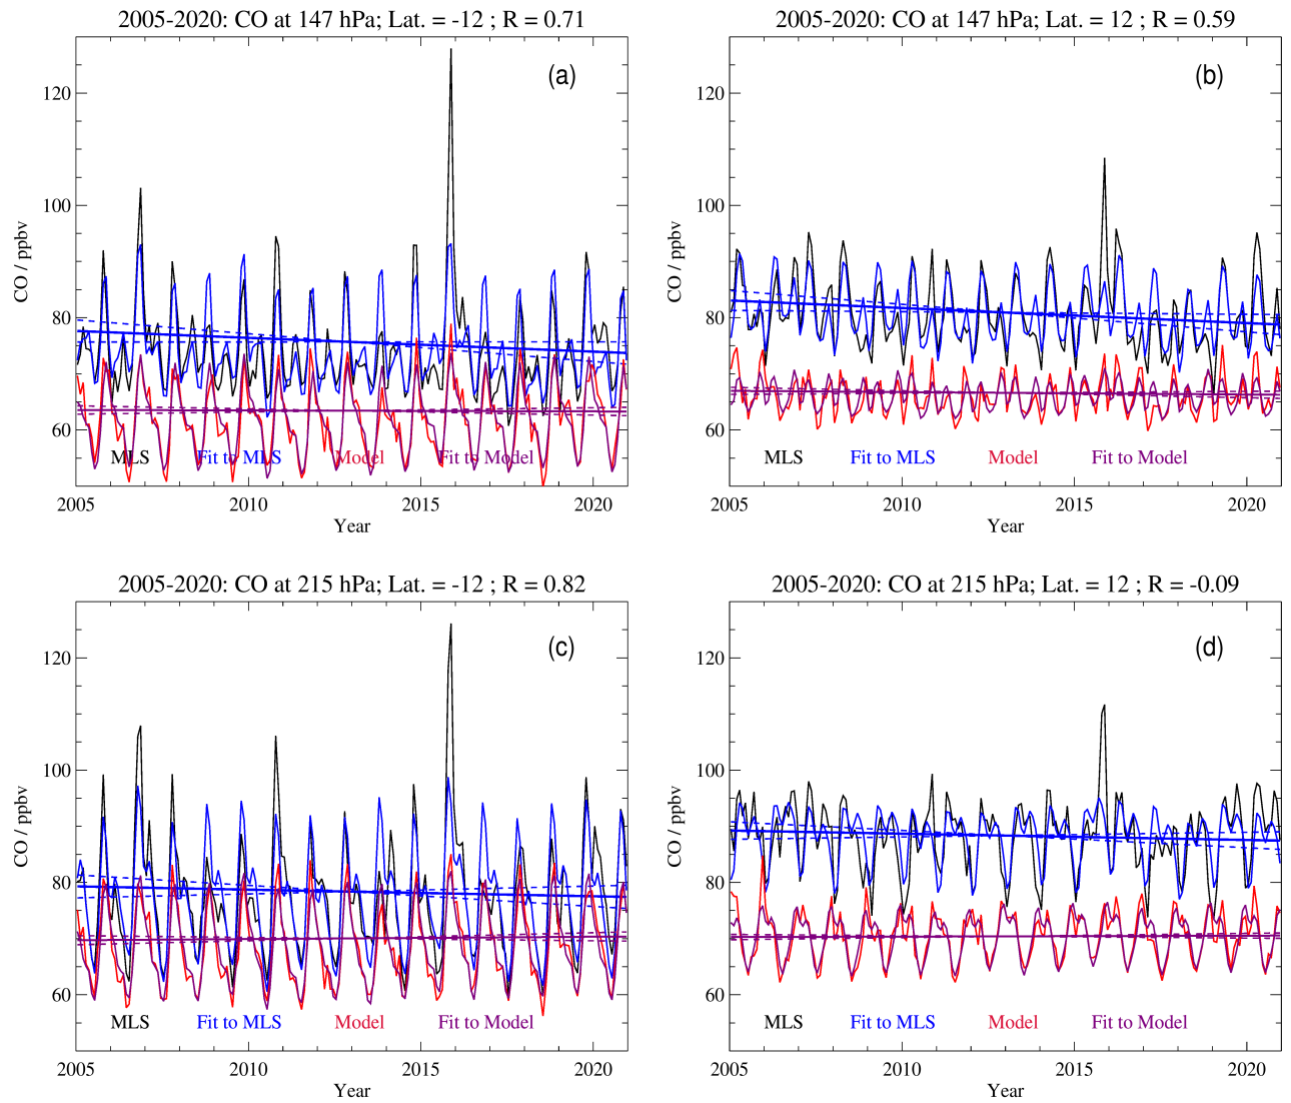

**Figure S2.** Same as Fig. S1 above, but for CO.

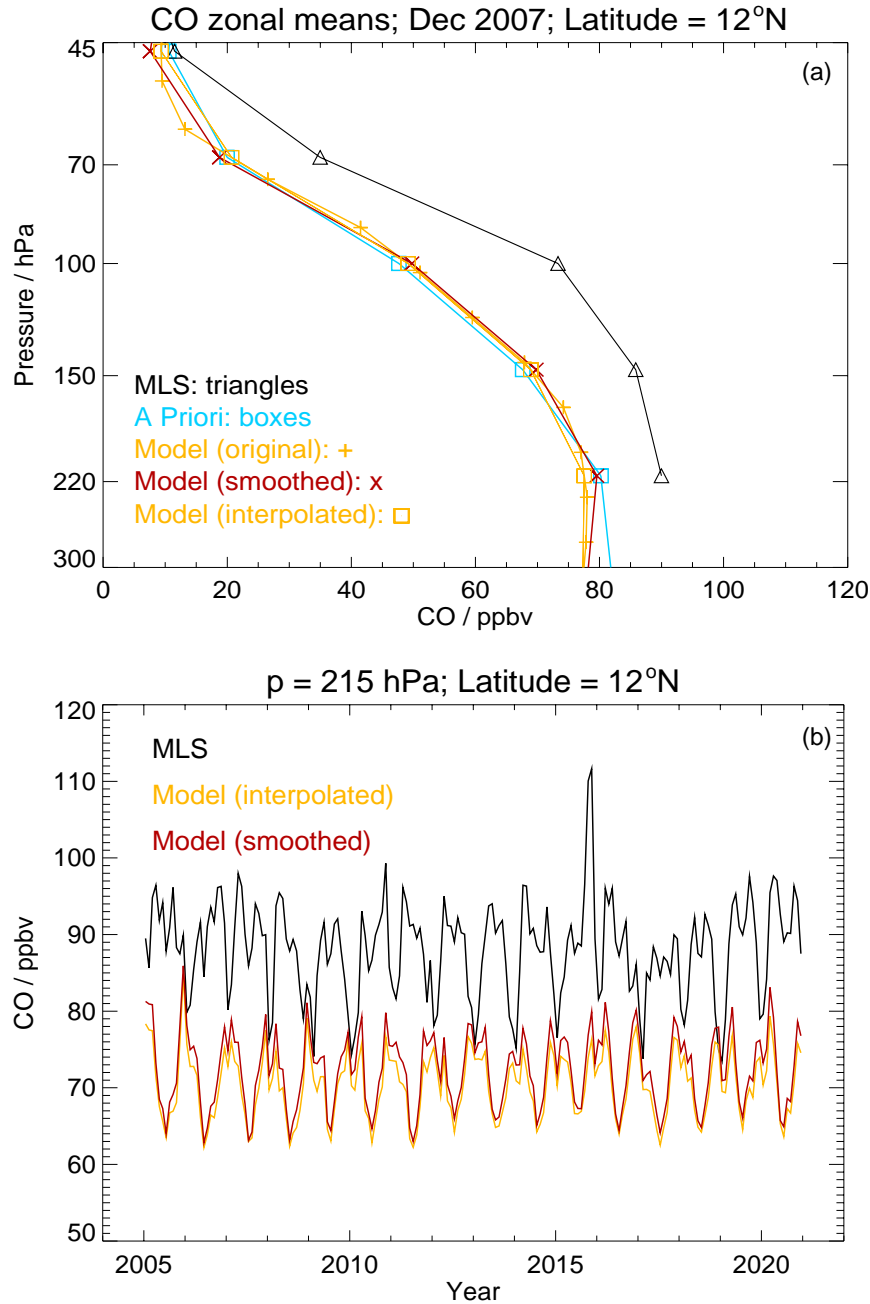

**Figure S3.** (a) Example of CO zonal mean profiles for December 2007 at 12°N, with MLS profile (black triangles), a priori tropical profile (cyan boxes), WACCM original profile on model grid (orange plus signs), smoothed model profile (red crosses) using the MLS tropical averaging kernels, and model profile using a simple interpolation (orange boxes). (b) CO zonal mean series at 215 hPa for 12°N from MLS (black), WACCM series from simple interpolated profiles, (orange), and WACCM series from smoothed profiles using the MLS tropical averaging kernels and a priori profiles (see (a)).

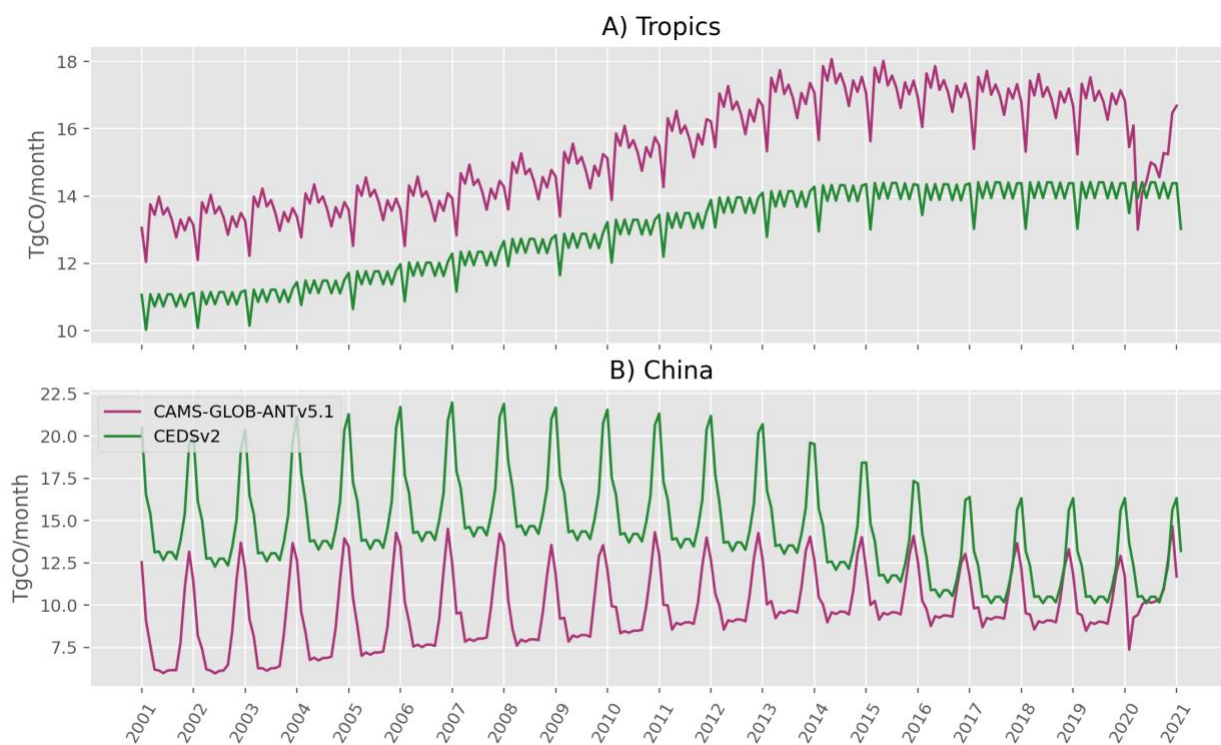

**Figure S4.** Emission time series for CAMS-GLOB-ANTv5.1 (Soulié et al., 2024) and CEDSv2 (McDuffie et al., 2020) for (A) the tropics (20°S–20°N) and (B) China.

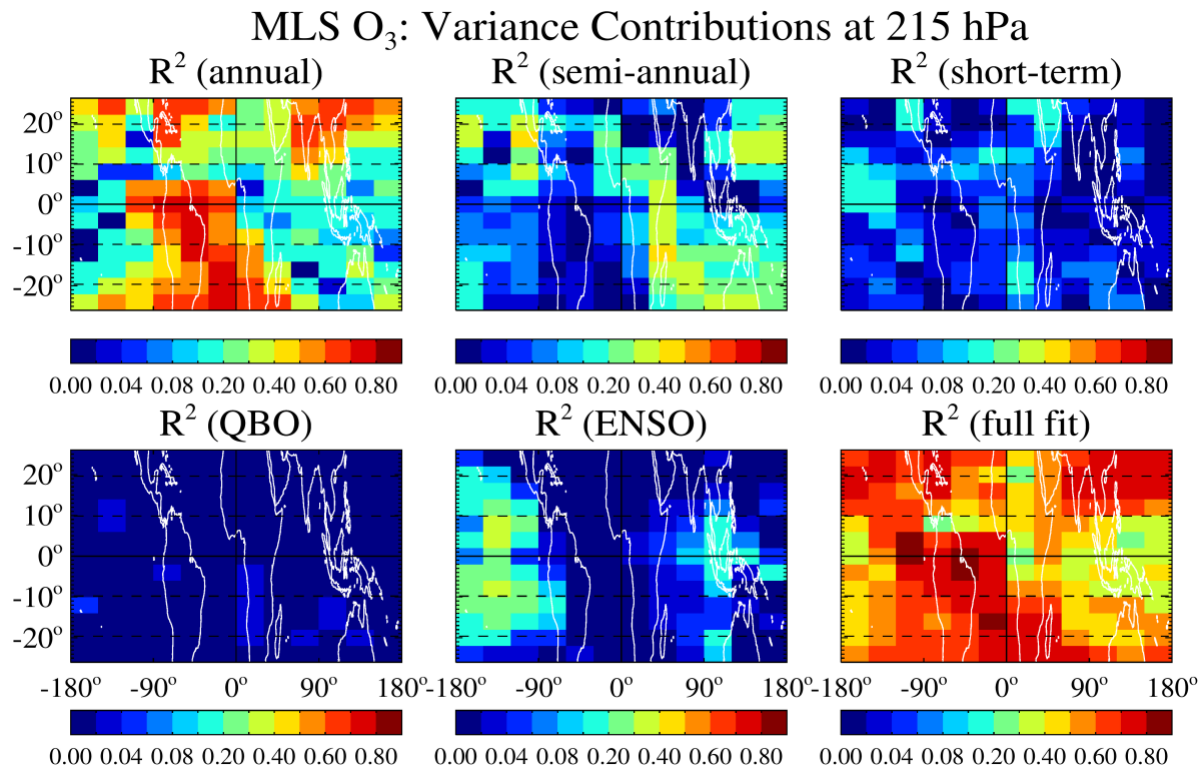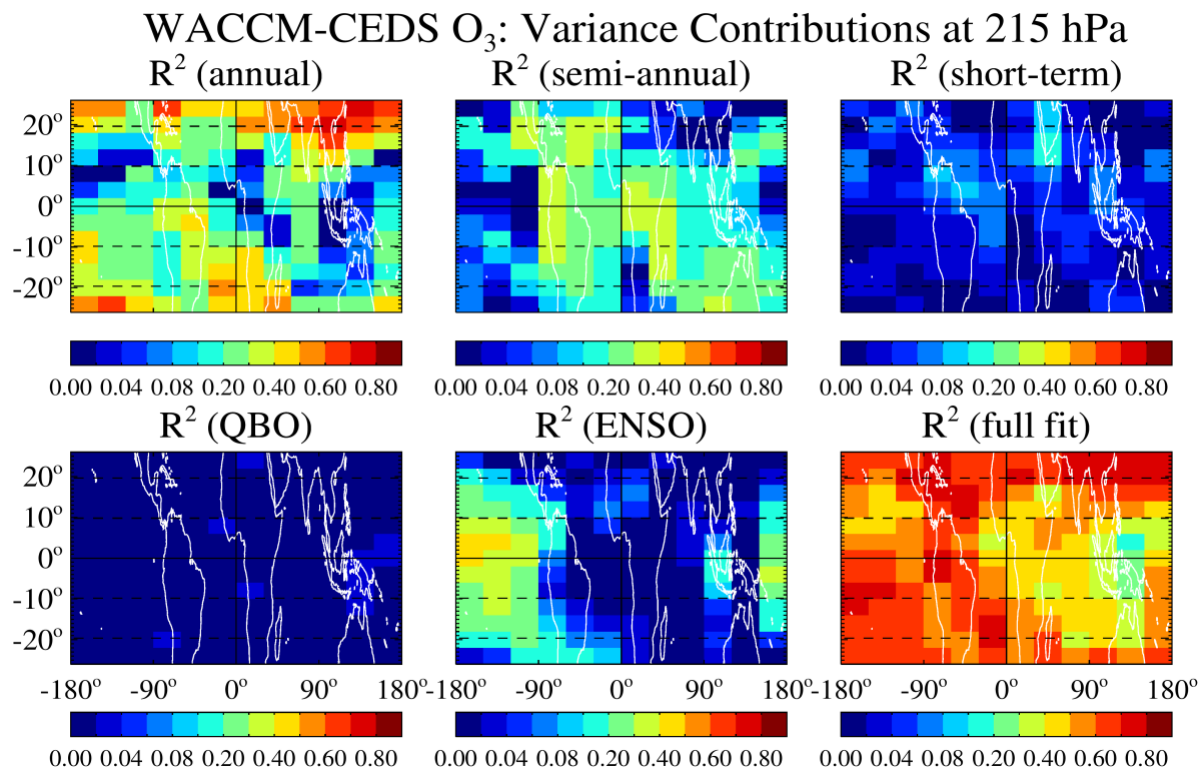

**Figure S5.** Same as Fig. 6 but for 215 hPa.



### MLS CO: Variance Contributions at 215 hPa

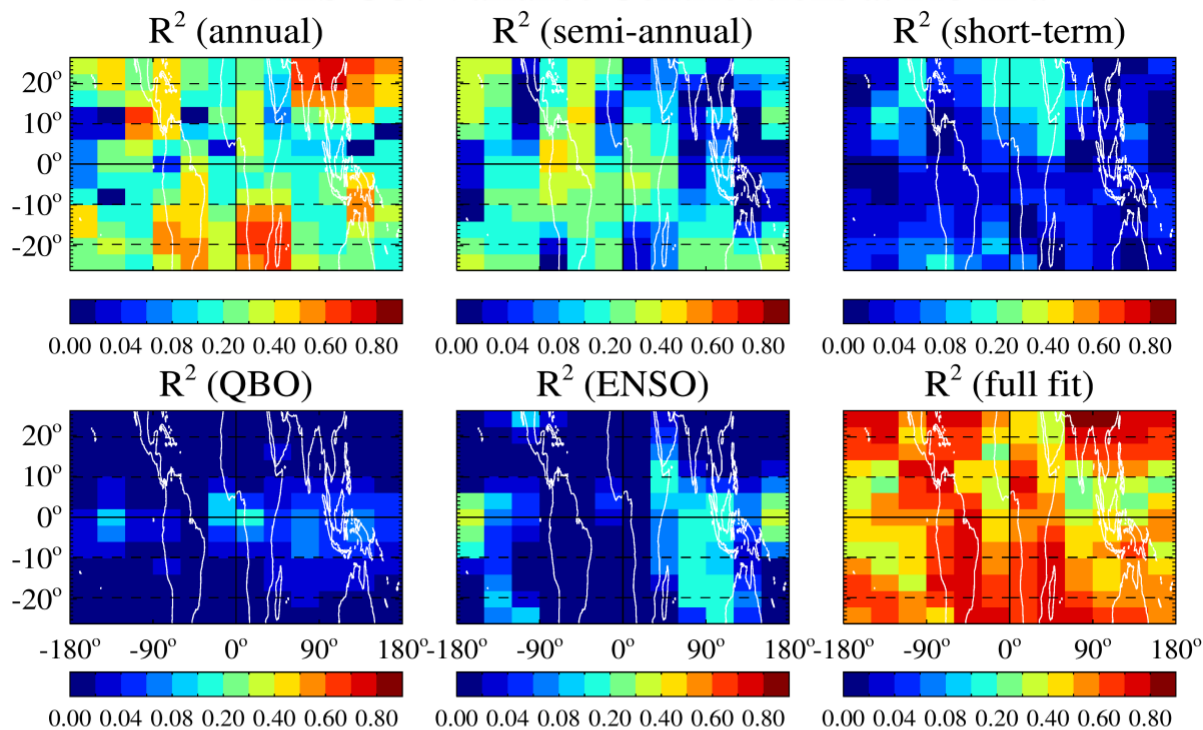

### WACCM-CEDS CO: Variance Contributions at 215 hPa

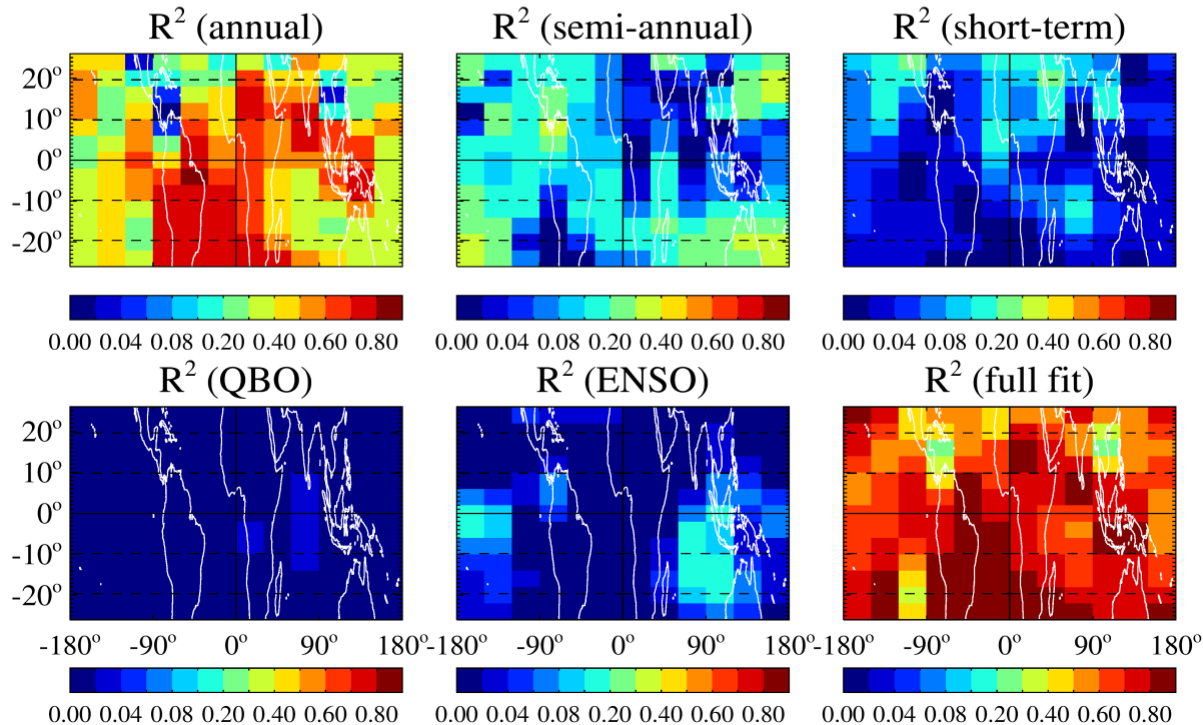

**Figure S6.** Same as Fig.15 but for 215 hPa.

**Table S1.** Aura MLS-derived tropical upper tropospheric trends (and  $2\sigma$  uncertainties) for O<sub>3</sub>, averaged between 147 and 215 hPa. Bold values highlight trends satisfying the 95% confidence level.

| Latitude degrees | O <sub>3</sub> trend and uncertainty ( $2\sigma$ ) % decade <sup>-1</sup> | O <sub>3</sub> trend and uncertainty ( $2\sigma$ ) ppbv decade <sup>-1</sup> |
|------------------|---------------------------------------------------------------------------|------------------------------------------------------------------------------|
| 24N              | <b>3.64 ± 3.10</b>                                                        | <b>2.96 ± 2.56</b>                                                           |
| 20N              | <b>3.87 ± 2.94</b>                                                        | <b>2.63 ± 2.01</b>                                                           |
| 16N              | <b>4.46 ± 3.10</b>                                                        | <b>2.64 ± 1.83</b>                                                           |
| 12N              | <b>4.22 ± 2.93</b>                                                        | <b>2.21 ± 1.52</b>                                                           |
| 8N               | <b>4.42 ± 2.82</b>                                                        | <b>2.18 ± 1.38</b>                                                           |
| 4N               | <b>4.22 ± 2.71</b>                                                        | <b>2.08 ± 1.32</b>                                                           |
| 0                | <b>4.03 ± 2.63</b>                                                        | <b>1.99 ± 1.29</b>                                                           |
| 4S               | <b>3.67 ± 2.59</b>                                                        | <b>1.81 ± 1.27</b>                                                           |
| 8S               | <b>3.73 ± 2.69</b>                                                        | <b>1.90 ± 1.37</b>                                                           |
| 12S              | <b>3.53 ± 2.59</b>                                                        | <b>1.87 ± 1.38</b>                                                           |
| 16S              | <b>3.44 ± 2.64</b>                                                        | <b>1.95 ± 1.51</b>                                                           |
| 20S              | <b>2.95 ± 2.57</b>                                                        | <b>1.88 ± 1.67</b>                                                           |
| 24S              | <b>2.32 ± 2.14</b>                                                        | <b>1.77 ± 1.66</b>                                                           |

**Table S2.** Aura MLS-derived tropical upper tropospheric trends (and  $2\sigma$  uncertainties) for CO, averaged between 147 and 215 hPa. Bold values highlight trends satisfying the 95% confidence level.

| Latitude degrees | CO trend and uncertainty ( $2\sigma$ ) % decade <sup>-1</sup> | CO trend and uncertainty ( $2\sigma$ ) ppbv decade <sup>-1</sup> |
|------------------|---------------------------------------------------------------|------------------------------------------------------------------|
| 24N              | <b>-3.32 ± 2.90</b>                                           | <b>-2.59 ± 2.26</b>                                              |
| 20N              | <b>-2.85 ± 2.79</b>                                           | <b>-2.28 ± 2.24</b>                                              |
| 16N              | <b>-2.81 ± 2.71</b>                                           | <b>-2.30 ± 2.22</b>                                              |
| 12N              | -2.30 ± 2.50                                                  | -1.90 ± 2.10                                                     |
| 8N               | -2.26 ± 2.56                                                  | -1.87 ± 2.15                                                     |
| 4N               | -2.57 ± 2.70                                                  | -2.10 ± 2.24                                                     |
| 0                | -2.78 ± 3.06                                                  | -2.22 ± 2.47                                                     |
| 4S               | -2.60 ± 3.15                                                  | -2.05 ± 2.51                                                     |
| 8S               | -2.40 ± 3.20                                                  | -1.86 ± 2.50                                                     |
| 12S              | -2.41 ± 3.33                                                  | -1.81 ± 2.53                                                     |
| 16S              | -2.28 ± 3.41                                                  | -1.66 ± 2.49                                                     |
| 20S              | -2.41 ± 3.33                                                  | -1.69 ± 2.36                                                     |
| 24S              | -2.31 ± 3.30                                                  | -1.51 ± 2.24                                                     |
